# Supplementary material for: High-pressure Ca metasomatism of metabasites (Mont Avic, Western Alps): insights into fluid–rock interaction during subduction
Source: Copernicus journal article supplement (doi:10.5194/ejm-36-767-2024), 2024-09-12
Supplement: Supplementary file 1 [file ejm-36-767-2024-supplement.zip]

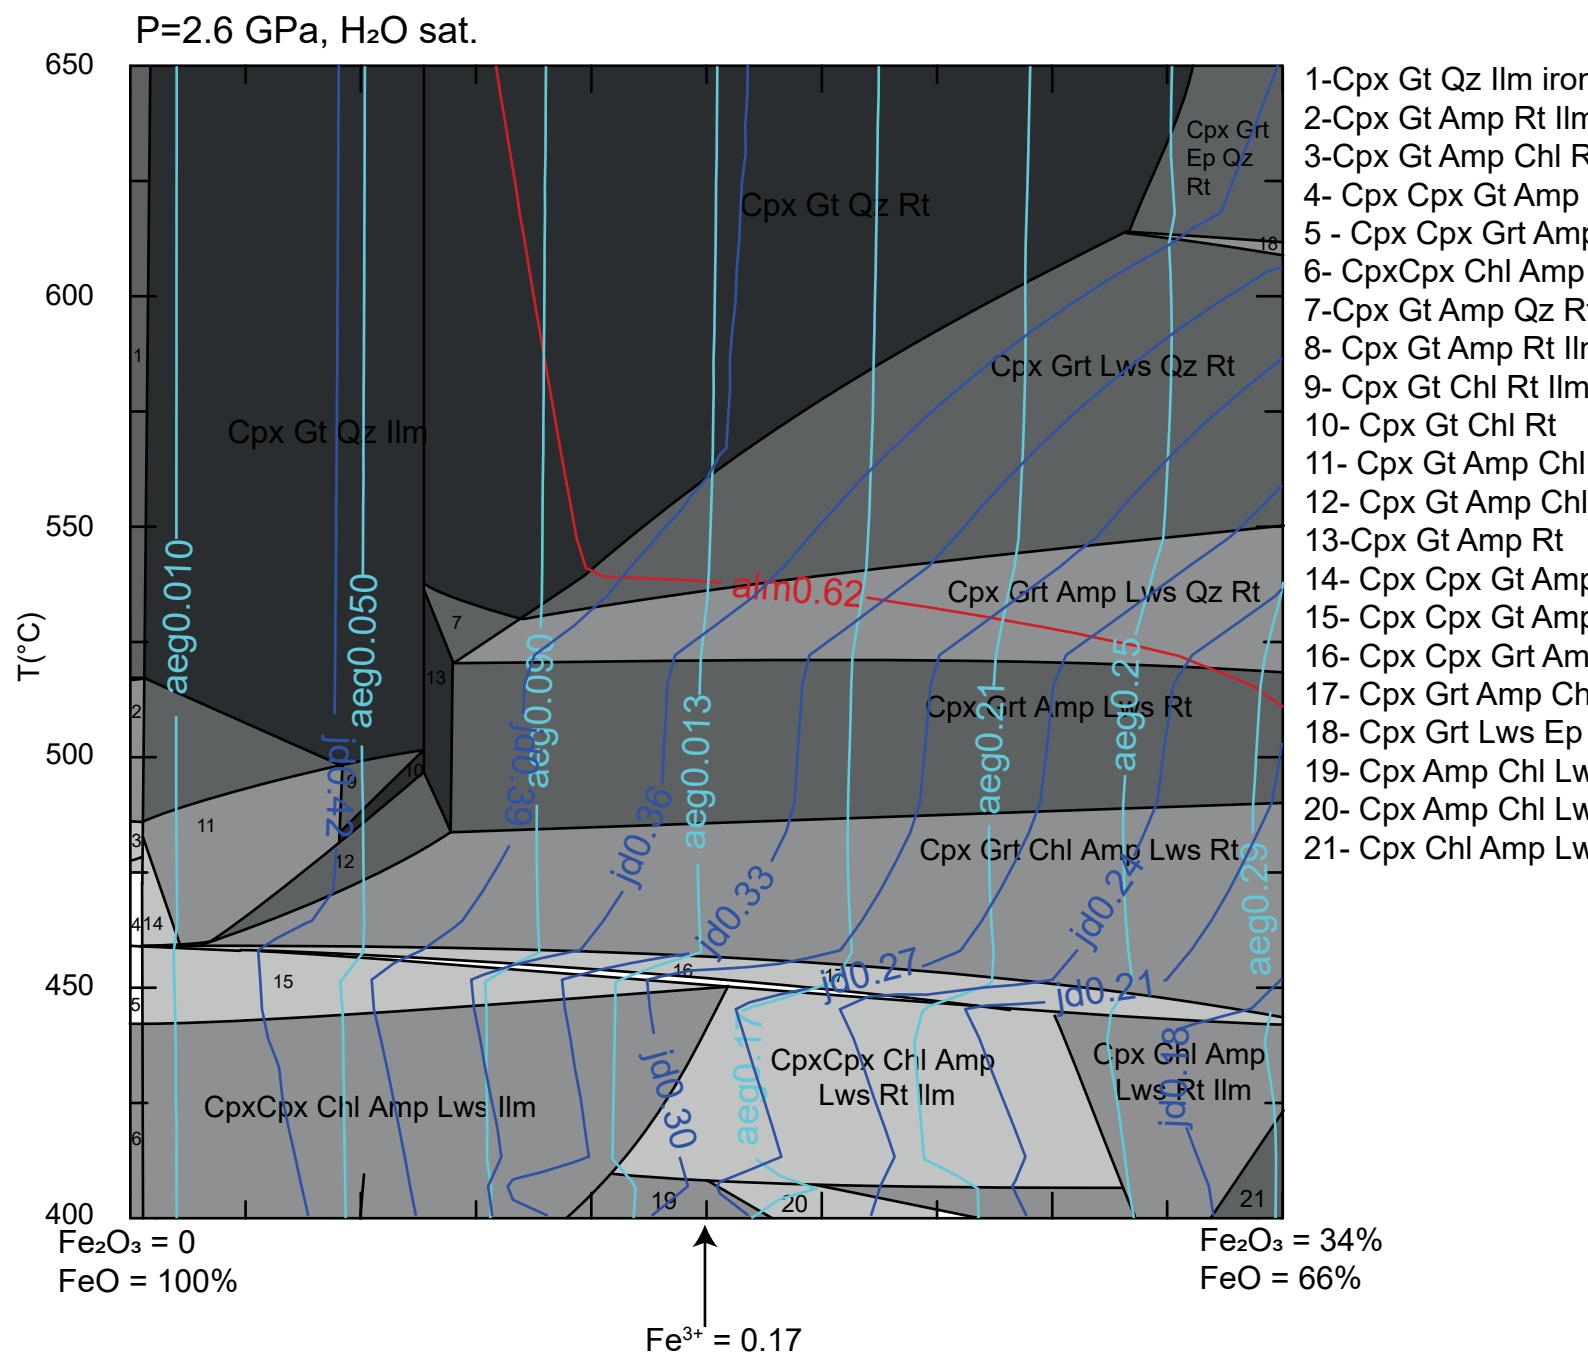

Figure S1: *T-X* compositions calculated at 2.6 GPa under water-saturated conditions and in the NCFMASHTi system. The *X* axis is the variation of the bulk composition ranging from FeO = 100%, Fe<sub>2</sub>O<sub>3</sub> = 0 to FeO = 66% and Fe<sub>2</sub>O<sub>3</sub> = 34%.
