# Supplementary material for: High-pressure Ca metasomatism of metabasites (Mont Avic, Western Alps): insights into fluid–rock interaction during subduction
Source: Copernicus journal article supplement (doi:10.5194/ejm-36-767-2024), 2024-09-12
Supplement: Supplementary file 1 [file ejm-36-767-2024-supplement.zip]

## Sheet: Table S1
	Table S1. mass balance calculation
	Echantillons	Mez211002(B)	Mez220801	N0S70S	Mez211002(A)	Average	SAV210501	SAV220601	Average	Tij	%
	SiO2	41.68	42.06	39.0358	40.72	40.874	43.61	44.28	43.61	-0.142407	-14.2407
	TiO2	2.83	2.4	6.18617	2.9	3.57904	6.37	6.13	6.37	-0.472004	-47.2004
	Al2O3	14.01	13.83	14.6709	14.7	14.3027	13.12	12.82	13.12	0.0167699	1.67699
	Fe2O3	16.31	16.25	17.3592	17.14	16.7648	18.27	17.54	18.27	-0.136687	-13.6687
	MnO	0.34	0.32	0.399752	0.36	0.354938	0.41	0.38	4.2	-0.171487	-17.1487
	MgO	4.39	4.68	3.60777	4.09	4.19194	4.2	4.88	10.32	-0.14866	-14.866
	CaO	18.1	17.76	17.839	18.53	18.0572	10.32	10.55	3.55	0.595521	59.5521
	Na2O	1.44	1.71	0.949412	1.02	1.27985	3.55	3.84	0.021	-0.680633	-68.0633
	K2O	0.02	0	0.0599629	0.02	0.0249907	0.021	0.05	0.12	-0.350926	-35.0926
	P2O5	0.72	0.71	0.33979	0.81	0.644947	0.12	0.13	0	3.75727	375.727
	LOI	0	0	0.0622213	0	0.0155553	0	0	0.125
	Echantillons						0
	Rb		4.3				0			0	0
	Th		3.9				0			0	0
	U		3.1				0			0	0
	Pb		3.4				0			0	0
	Sr		813.7				43.8			16.1291	1612.91
	Nb		4.8				5.4			-0.18042	-18.042
	Zr		102.6				94.6			0	0
	Y		52.8				33.5			0.453225	45.3225
	La		19.4				0			0	0
	Ce		40.6				0			0	0
	Nd		40.5				10.2			2.66099	266.099
	Sm		4.2				0			0	0
	Yb		7.5				4.3			0.608187	60.8187
	Sc		25.6				49.5			-0.523154	-52.3154
	V		326.5				643.9			-0.532471	-53.2471
	Cr		28.8				1.1			23.1404	2314.04
	Ni		49.3				19			1.39242	139.242
	Cu		18.6				45.5			-0.623083	-62.3083
	Zn		55.9				89.8			-0.426043	-42.6043
	Ga		14.6				17			-0.208141	-20.8141
	Ge		0				1.6			-1	-100
	Sn		2.9				4.6			-0.418722	-41.8722
	Ta		2.4				2.4			-0.0779727	-7.79727
	Co		13.6				39.3			-0.680927	-68.0927

## Sheet: Table S2
	Table S2. Time integrated fluid flux
		Value	Units
	LGF	100	m
	ni	4340	mol/m3
	Cieq	0	mol/m3
	Ciinput	Connoly et.al.2018	mol/m3
		0.3	mol/kg
		360	mol/m3
	qTI	1205.56	m3 Fluide/m2 Roche
	Ciinput	Manning (2004)
		0.008	mol/kg
		9.6	mol/m3
	qTI	45208.3	m3 Fluide/m2 Roche
		Metabasite/Serpentinite
	Rock density	2600	kg/m3
	Water density at 2.5GPa	1200	kg/m3
	Fluid content wt%	3	wt% (Padrón-Navarta et al., 2010)
	Water loss	78	kg/m3
	Water loss	0.065	m3/m3
		695513	m3
		Sediment
	Fluid content wt%	4.5	wt% (Kerrick & connolly 2001)
	Water loss	117	kg/m3
	Water loss	0.0975	m3/m3
	Rock volume	12364.7	m3
