# Supplementary material for: High-pressure Ca metasomatism of metabasites (Mont Avic, Western Alps): insights into fluid–rock interaction during subduction
Source: Copernicus journal article supplement (doi:10.5194/ejm-36-767-2024), 2024-09-12
Supplement: Supplementary file 2 [file ejm-36-767-2024-supplement.zip]

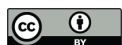

*Supplement of*

## **High-pressure Ca metasomatism of metabasites (Mont Avic, Western Alps): insights into fluid–rock interaction during subduction**

**Kilian Lecacheur et al.**

*Correspondence to:* Kilian Lecacheur ([kilian.lecacheur@univ-fcomte.fr](mailto:kilian.lecacheur@univ-fcomte.fr))

- [ejm-36-767-2024-supplement-title-page.pdf](#)
- [Figure S1.pdf](#)
- [Supplementary tables.xlsx](#)

The copyright of individual parts of the supplement might differ from the article licence.
